# Supplementary material for: Ecology and biogeography of megafauna and macrofauna at the first known deep-sea hydrothermal vents on the ultraslow-spreading Southwest Indian Ridge
Source: PubMed Central journal article supplement (PMC5155287; doi:10.1038/srep39158), 2016-12-14
Supplement: srep39158-s1.pdf [file srep39158-s1.pdf]

## SUPPLEMENTARY INFORMATION

### ***Ecology and biogeography of megafauna and macrofauna at the first known deep-sea hydrothermal vents on the ultraslow-spreading Southwest Indian Ridge***

Copley JT<sup>1,\*</sup>, Marsh L<sup>1</sup>, Glover AG<sup>2</sup>, Hühnerbach V<sup>3</sup>, Nye VE<sup>1</sup>, Reid WDK<sup>4</sup>,  
Sweeting CJ<sup>5</sup>, Wigham BD<sup>5</sup>, Wiklund H<sup>2</sup>

<sup>1</sup>Ocean & Earth Science, University of Southampton, Waterfront Campus, European Way, Southampton SO14 3ZH, UK

<sup>2</sup>Life Sciences Department, Natural History Museum, Cromwell Road, London SW7 5BD, UK

<sup>3</sup>formerly at National Oceanography Centre, European Way, Southampton SO14 3ZH, UK

<sup>4</sup>School of Biology, Newcastle University, Newcastle Upon Tyne NE1 7RU, UK

<sup>5</sup>Dove Marine Laboratory, School of Marine Science & Technology, Newcastle University, Cullercoats NE30 4PZ, UK

\*email [jtc@southampton.ac.uk](mailto:jtc@southampton.ac.uk) (corresponding author)

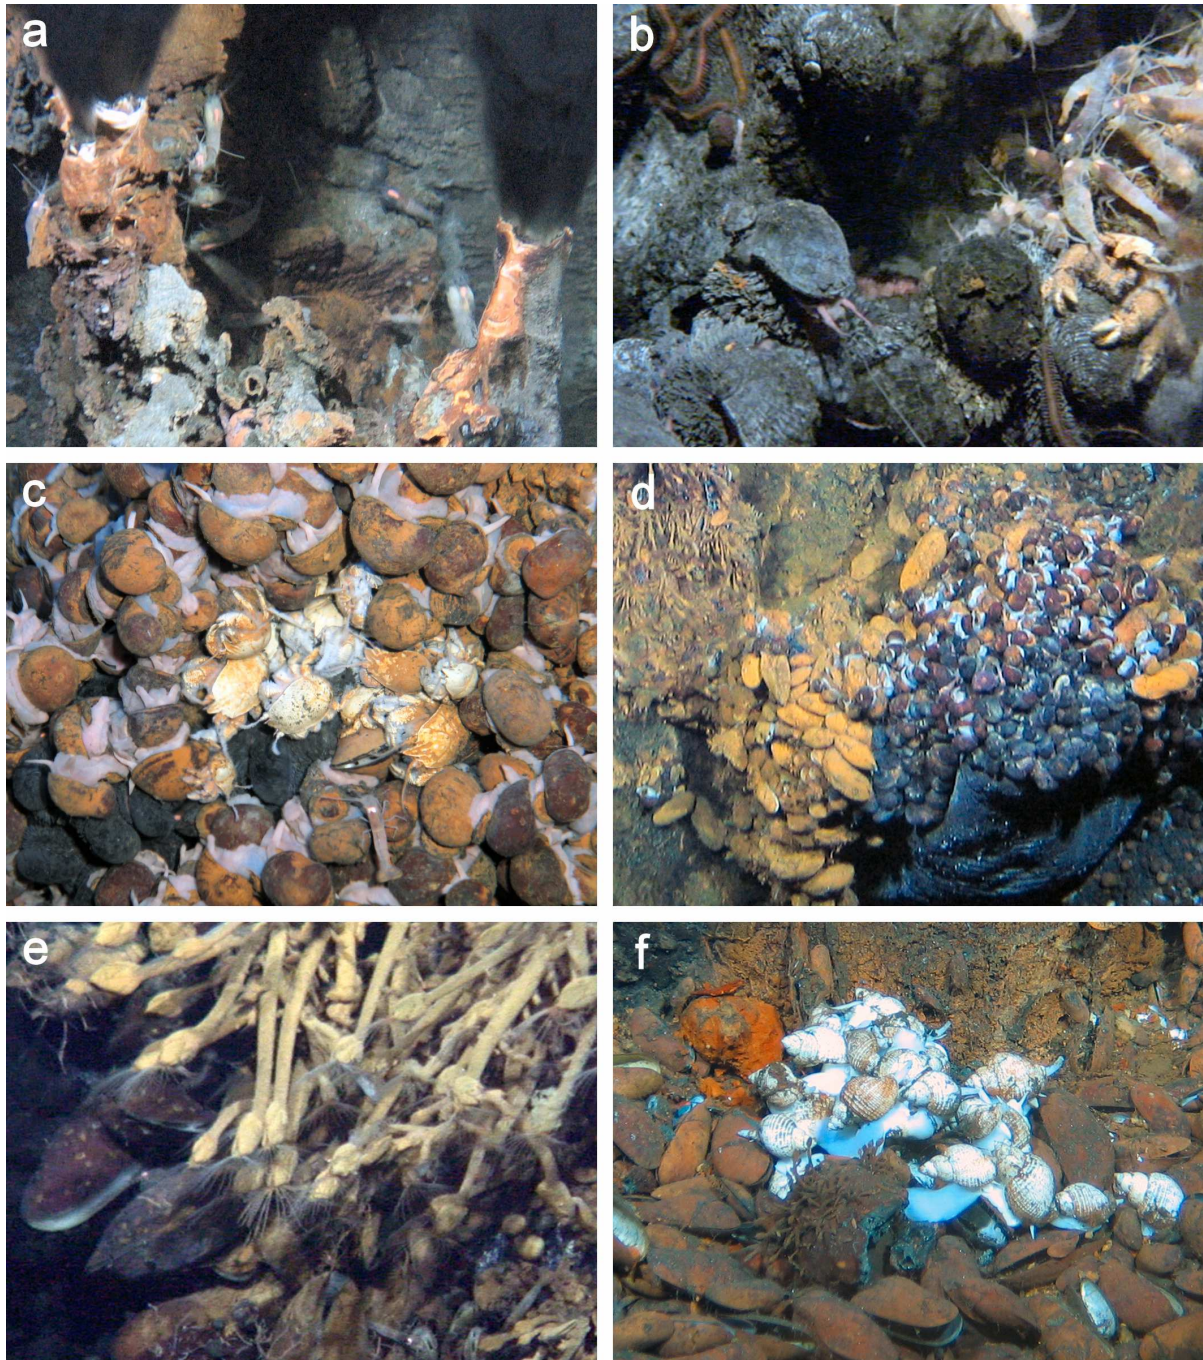

**SUPPLEMENTARY FIGURE:** Images of faunal assemblages observed at Longqi vent field, Southwest Indian Ridge, during the first remotely operated vehicle (ROV) dives in November 2011: (a) active “black smoker” chimneys occupied by *Rimicaris kairei*; (b) assemblage of *Chrysomallon squamiferum*, *Hesiolyra* cf. *bergi*, *Kiwa* n. sp. “SWIR”, *Mirocaris fortunata* in close proximity to vent fluid source; (c) abundant *Chrysomallon squamiferum* and *Gigantopelta aegis*, with *Kiwa* n. sp. “SWIR”, *Bathymodiolus marisindicus*, and *Mirocaris fortunata* on platform of “Tiamat” vent chimney (d) zonation of *Chrysomallon squamiferum*, *Gigantopelta aegis*, *Bathymodiolus marisindicus*, and *Neolepas* sp. 1 with distance from actively venting beehive diffuser; (e) transition between aggregations of *Bathymodiolus marisindicus* and *Neolepas* sp. 1; (f) aggregation of *Phymorhynchus* n. sp. “SWIR” associated with dead mussel shells at base of active vent chimney.





|                                   |              |            |                  |                                 |    |    |   |    |   |    |    |    |    |    |    |    |    |    |
|-----------------------------------|--------------|------------|------------------|---------------------------------|----|----|---|----|---|----|----|----|----|----|----|----|----|----|
| Arthropoda                        | Malacostraca | Tanaidacea | Colletteidae     | <i>Leptognathiella fragilis</i> | 0  | 0  | 0 | 0  | 0 | 1  | 0  | 0  | 0  | 0  | 0  | 0  | 0  | 0  |
| Arthropoda                        | Malacostraca | Tanaidacea | Leptocheilidae   | <i>Mesotanais styxis</i>        | 0  | 0  | 0 | 0  | 0 | 1  | 0  | 0  | 0  | 0  | 0  | 0  | 0  | 0  |
| Arthropoda                        | Malacostraca | Tanaidacea | Nototanaidae     | <i>Obesutanais sigridi</i>      | 0  | 0  | 0 | 0  | 0 | 1  | 0  | 0  | 0  | 0  | 0  | 0  | 0  | 0  |
| Arthropoda                        | Malacostraca | Tanaidacea | Typhlotanaidae   | <i>Typhlotanais incognitus</i>  | 0  | 0  | 0 | 0  | 0 | 1  | 0  | 0  | 0  | 0  | 0  | 0  | 0  | 0  |
| Echinodermata                     | Asterozoa    |            | Paulasteriidae   | <i>Paulasterias tyleri</i>      | 0  | 0  | 0 | 0  | 0 | 0  | 0  | 0  | 0  | 0  | 0  | 0  | 1  | 1  |
| Echinodermata                     | Ophiurozoa   |            | Ophiuridae       | <i>Ophioctenella acies</i>      | 0  | 0  | 0 | 0  | 0 | 1  | 1  | 1  | 1  | 1  | 1  | 1  | 0  | 0  |
| Echinodermata                     | Holothurozoa |            | Chiridotidae     | <i>Chiridota</i> sp.            | 1  | 0  | 0 | 0  | 0 | 0  | 0  | 0  | 0  | 0  | 0  | 0  | 0  | 0  |
| Echinodermata                     | Holothurozoa |            | -                | Apodacean sp.                   | 0  | 0  | 0 | 1  | 0 | 0  | 0  | 0  | 0  | 0  | 0  | 0  | 0  | 0  |
| Chaetognatha                      | Sagittozoa   |            | Spadellidae      | <i>Calispadella alata</i>       | 0  | 0  | 0 | 0  | 0 | 1  | 0  | 0  | 0  | 0  | 0  | 0  | 0  | 0  |
| Chordata                          | Actinopteri  |            | Synphobranchidae | <i>Ilyophis saldanhai</i>       | 0  | 0  | 0 | 0  | 0 | 0  | 1  | 0  | 0  | 0  | 0  | 0  | 0  | 0  |
| Chordata                          | Actinopteri  |            | Lotidae          | <i>Gaidropsaurus</i> sp.        | 0  | 0  | 0 | 0  | 0 | 1  | 0  | 0  | 0  | 0  | 0  | 0  | 0  | 0  |
| Chordata                          | Actinopteri  |            | Zoarcidae        | <i>Pachycara thermophilum</i>   | 0  | 0  | 0 | 0  | 0 | 0  | 1  | 1  | 1  | 1  | 0  | 1  | 0  | 0  |
| Chordata                          | Actinopteri  |            | Zoarcidae        | <i>Pachycara saldanhai</i>      | 0  | 0  | 0 | 0  | 0 | 1  | 1  | 0  | 0  | 0  | 0  | 0  | 0  | 0  |
| Total species at each vent field: |              |            |                  |                                 | 21 | 35 | 9 | 21 | 4 | 47 | 23 | 18 | 17 | 25 | 20 | 32 | 12 | 14 |
